# Supplementary material for: Design of an n-type low glass transition temperature radical polymer
Source: Royal Society of Chemistry journal article supplement (doi:10.1039/d0py01645d), 2021-01-01
Supplement: d0py01645d1.pdf [file d0py01645d1.pdf]

## Electronic Supplementary Material

### Design of an n-type, low glass transition temperature radical polymer

Teng Chi,<sup>a</sup> Siddhartha Akkiraju,<sup>b</sup> Zihao Liang,<sup>b</sup> Ying Tan,<sup>b</sup> Ho Joong Kim,<sup>b</sup> Xikang Zhao,<sup>b</sup> Brett M. Savoie,<sup>\*,b</sup> and Bryan W. Boudouris<sup>\*,a,b</sup>

<sup>a</sup> Department of Chemistry, Purdue University, 560 Oval Drive, West Lafayette, Indiana 47907, USA

<sup>b</sup> Charles D. Davidson School of Chemical Engineering, Purdue University, 480 Stadium Avenue, West Lafayette, Indiana 47907, USA

\* To whom correspondence should be addressed: bsavoie@purdue.edu (B.M.S.) and boudouris@purdue.edu (B.W.B.)

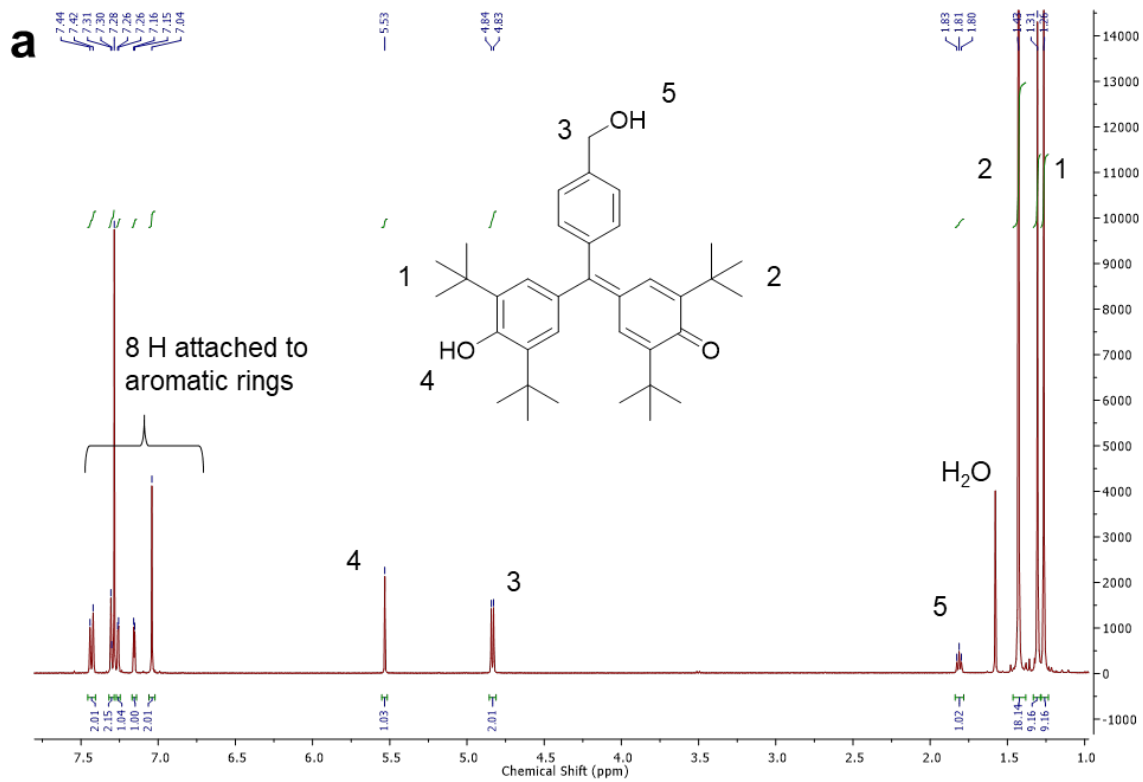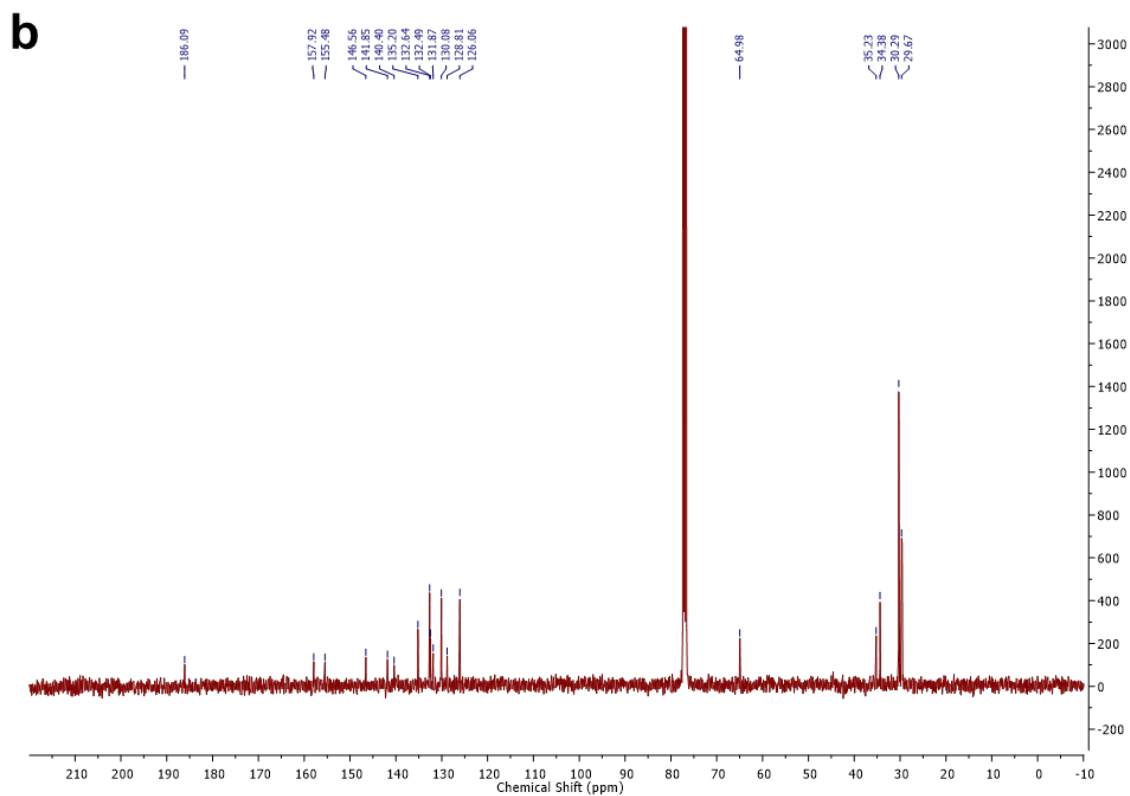

**Figure S1.** (a)  $^1\text{H}$  NMR and (b)  $^{13}\text{C}$  NMR spectra of 2,6-di-tert-butyl-4-((3,5-di-tert-butyl-4-hydroxyphenyl)(4-(hydroxymethyl) phenyl)methylene)cyclohexa-2,5-dien-1-one (**5**).

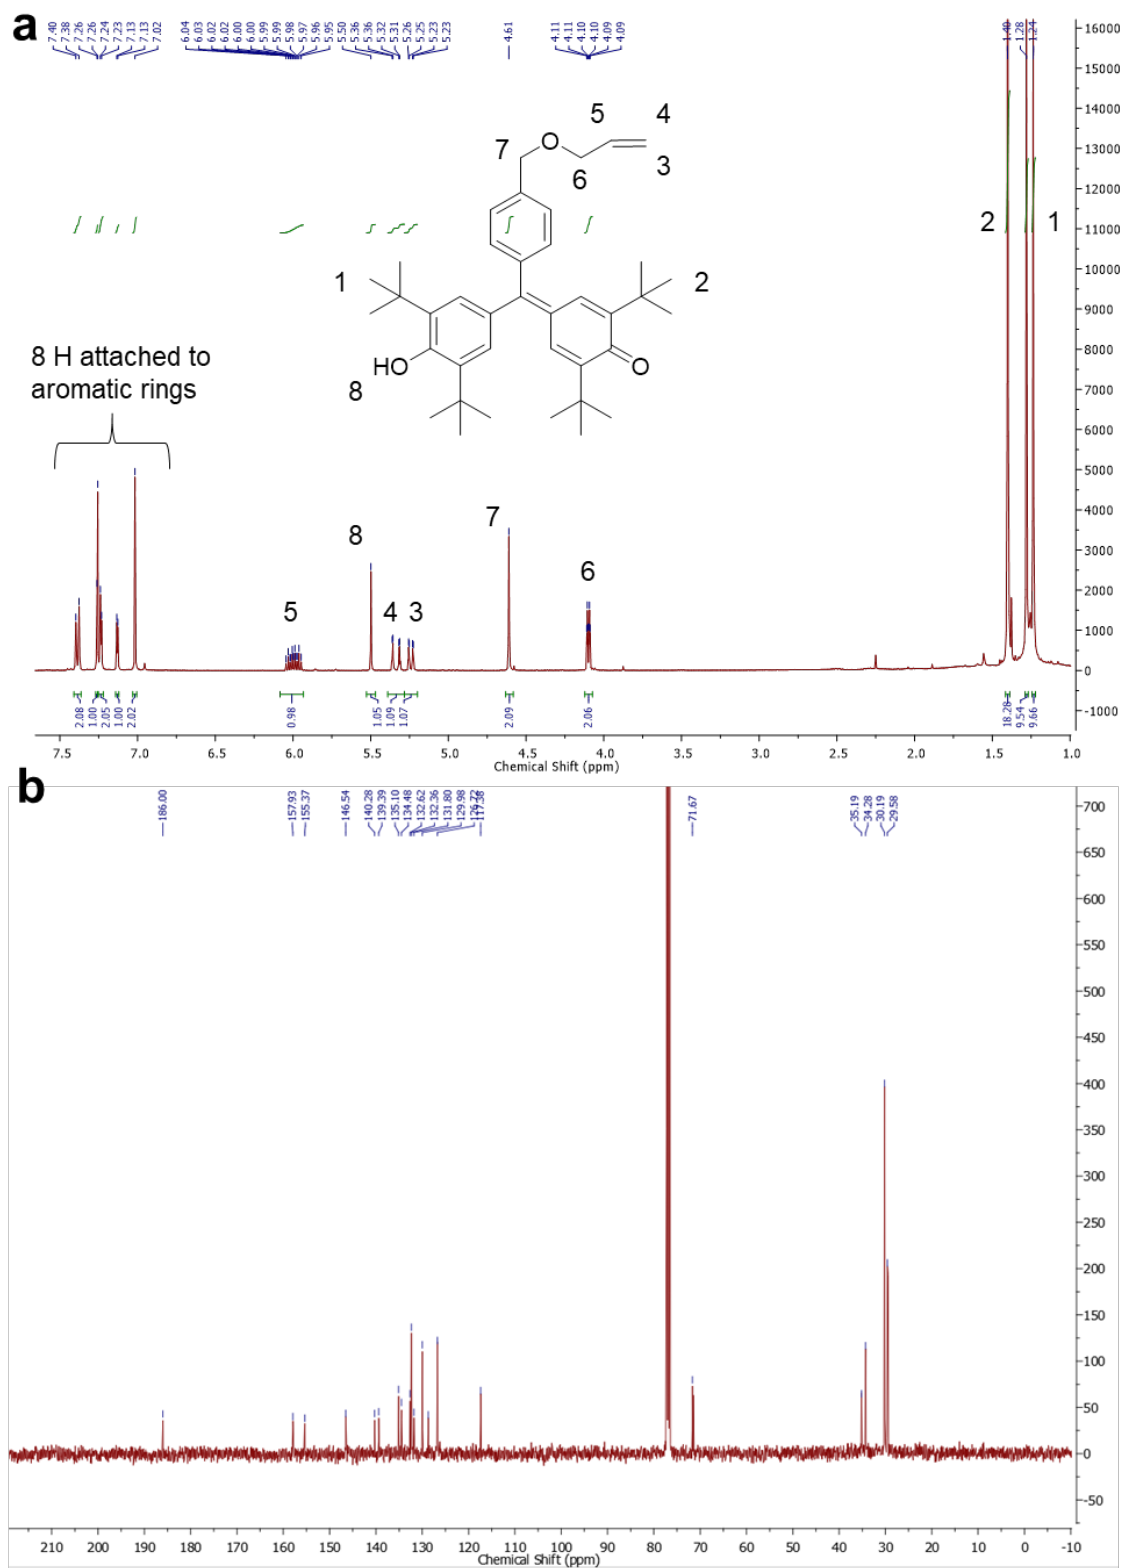

**Figure S2.** (a)  $^1\text{H}$  NMR and (b)  $^{13}\text{C}$  NMR spectra of 4-((4-((allyloxy)methyl)phenyl)(3,5-di-tert-butyl-4-hydroxyphenyl)methylene)-2,6-di-tert-butylcyclohexa-2,5-dien-1-one (**6**).

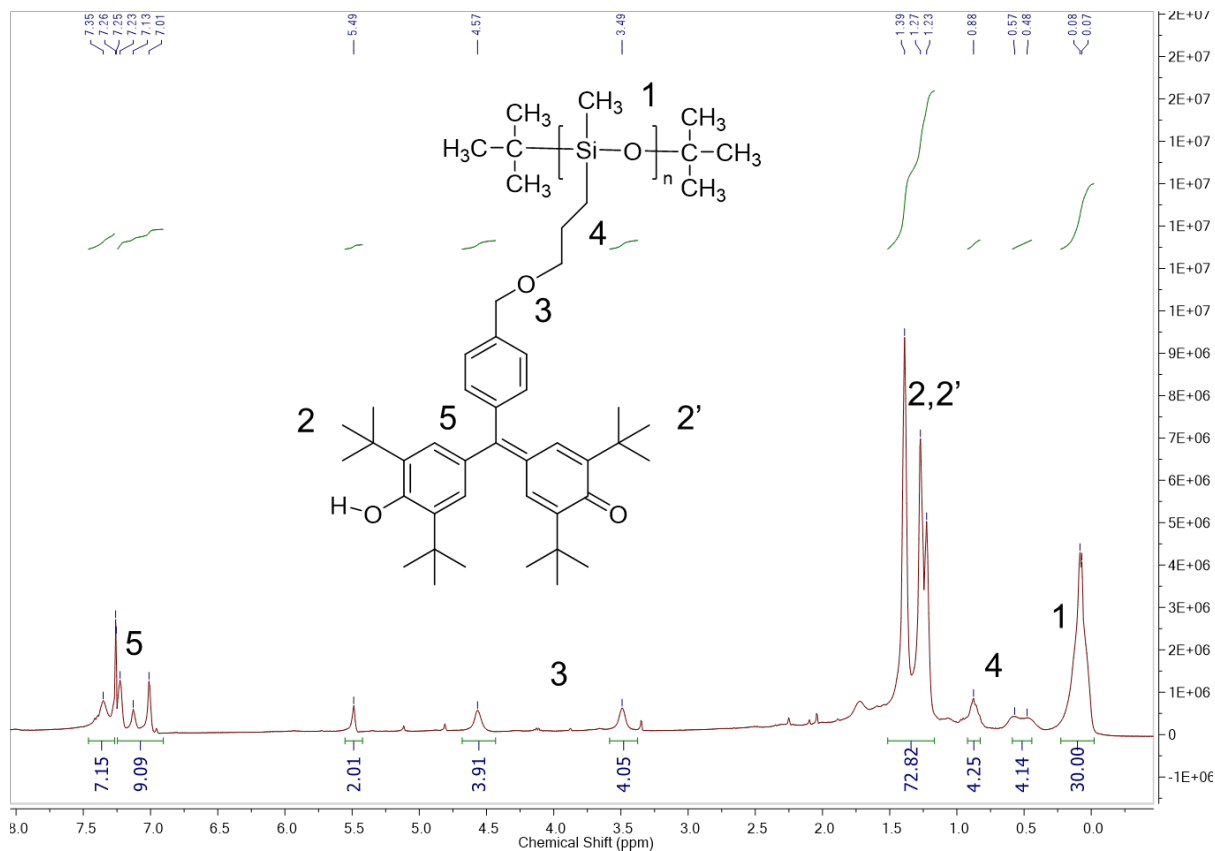

**Figure S3.**  $^1\text{H}$  NMR spectrum of quenched PGMS (PGMS-H) in  $\text{CDCl}_3$ . PGMS was converted to PGMS-H by stirring with a 0.1 M HCl in methanol solution.

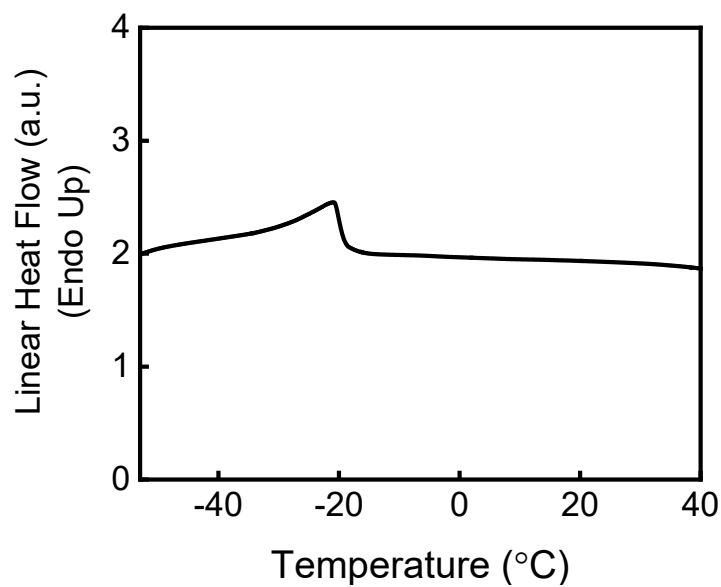

**Figure S4.** Second heating DSC trace of the PGMS-4 polymer. These data were acquired at a scan rate of  $10\text{ }^\circ\text{C min}^{-1}$ .

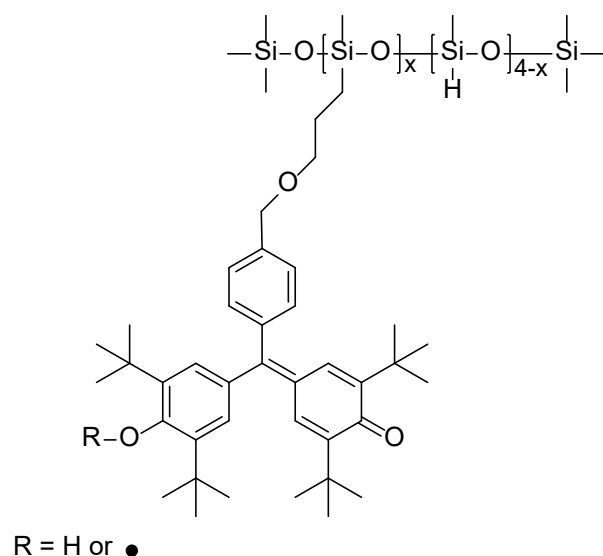

**Figure S5.** The molecular structure of PGMS-4. The radical content ( $r_{PGMS}$ ) was calculated by using the following equation.

$$r_{PGMS} = f \frac{I_{PGMS}}{I_S} \times \frac{n_S}{n_{PGMS}} \times 100\% \quad (\text{Equation S1})$$

Here,  $I_{PGMS}$  and  $I_S$  are the EPR spectroscopy resonance intensity for PGMS and small galvinoxyl standard, respectively. Similarly,  $n_{PGMS}$  and  $n_S$  are the moles of PGMS and the small molecule standard that were loaded in the instrument.  $f$  ( $f = x/4$  for PGMS-4) is the fraction of sites that have a galvinoxyl precursor unit present (i.e., the fraction of sites that have successfully undergone the coupling reaction to the polysiloxane backbone).

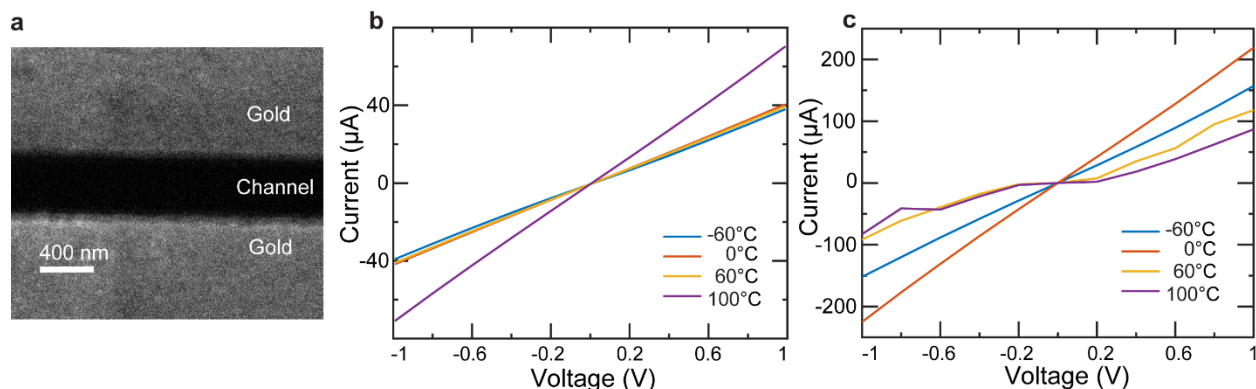

**Figure S6.** (a) A scanning electron microscopy (SEM) image of a device channel prior to coating the PGMS polymer. The image shows the two gold contacts and the insulating substrate on which the polymer was cast. Current-voltage (I-V) curves of (b) PGMS-4-13 and (c) PGMS-4-36 at different temperatures.
